# Supplementary material
Source: publisher figshare collection journal article supplement (https://f1000.figshare.com/ndownloader/files/1184480)
Supplement: Supplementary file 1 [file 1184480]

True class	Organism	Predicted class	P(Predicted class)
Aerobe	Acaryochloris marina MBIC11017	Aerobe	1.0
Aerobe	Acetobacter pasteurianus IFO 3283-01-42C	Aerobe	1.0
Aerobe	Achromobacter xylosoxidans A8	Aerobe	1.0
Aerobe	Acidiphilium cryptum JF-5	Aerobe	1.0
Aerobe	Acidobacterium capsulatum ATCC 51196	Aerobe	1.0
Aerobe	Acidothermus cellulolyticus 11B	Aerobe	1.0
Aerobe	Acinetobacter baumannii AB0057	Aerobe	1.0
Aerobe	Agrobacterium radiobacter K84	Aerobe	1.0
Aerobe	Alcanivorax borkumensis SK2	Aerobe	1.0
Aerobe	Alicyclobacillus acidocaldarius subsp acidocaldarius DSM 446	Aerobe	1.0
Aerobe	Amycolatopsis mediterranei S699	Aerobe	1.0
Aerobe	Anabaena variabilis ATCC 29413	Aerobe	1.0
Aerobe	Anaplasma centrale str Israel	Anaerobe	1.0
Aerobe	Aquifex aeolicus VF5	Anaerobe	1.0
Aerobe	Arthrobacter aurescens TC1	Aerobe	1.0
Aerobe	Asticcacaulis excentricus CB 48	Aerobe	1.0
Aerobe	Azotobacter vinelandii DJ	Aerobe	1.0
Aerobe	Bartonella bacilliformis KC583	Anaerobe	1.0
Aerobe	Bdellovibrio bacteriovorus HD100	Aerobe	1.0
Aerobe	Beijerinckia indica subsp indica ATCC 9039	Aerobe	1.0
Aerobe	Beutenbergia cavernae DSM 12333	Aerobe	1.0
Aerobe	Brachybacterium faecium DSM 4810	Aerobe	1.0
Aerobe	Bradyrhizobium japonicum USDA 110	Aerobe	1.0
Aerobe	Brevibacillus brevis NBRC 100599	Aerobe	1.0
Aerobe	Brevundimonas subvibrioides ATCC 15264	Aerobe	1.0
Aerobe	Catenulispora acidiphila DSM 44928	Aerobe	1.0
Aerobe	Caulobacter crescentus CB15	Aerobe	1.0
Aerobe	Cellulophaga algicola DSM 14237	Aerobe	1.0
Aerobe	Cellvibrio japonicus Ueda107	Aerobe	1.0
Aerobe	Chitinophaga pinensis DSM 2588	Aerobe	1.0
Aerobe	Chromohalobacter salexigens DSM 3043	Aerobe	1.0
Aerobe	Clavibacter michiganensis subsp michiganensis NCPPB 382	Aerobe	1.0
Aerobe	Comamonas testosteroni CNB-2	Aerobe	1.0
Aerobe	Conexibacter woesei DSM 14684	Aerobe	1.0
Aerobe	Coraliomargarita akajimensis DSM 45221	Aerobe	1.0
Aerobe	Croceibacter atlanticus HTCC2559	Aerobe	1.0
Aerobe	Cytophaga hutchinsonii ATCC 33406	Aerobe	1.0
Aerobe	Deinococcus deserti VCD115	Aerobe	1.0
Aerobe	Delftia sp Cs1-4	Aerobe	1.0
Aerobe	Dinoroseobacter shibae DFL 12	Aerobe	1.0
Aerobe	Dyadobacter fermentans DSM 18053	Aerobe	1.0
Aerobe	Erythrobacter litoralis HTCC2594	Aerobe	1.0
Aerobe	Flavobacterium johnsoniae UW101	Aerobe	1.0
Aerobe	Fluviicola taffensis DSM 16823	Aerobe	1.0
Aerobe	Francisella novicida U112	Anaerobe	0.999999999999
Aerobe	Frankia sp CcI3	Aerobe	1.0
Aerobe	Gemmatimonas aurantiaca T-27	Aerobe	1.0
Aerobe	Geodermatophilus obscurus DSM 43160	Aerobe	1.0
Aerobe	Gluconacetobacter diazotrophicus PAl 5	Aerobe	1.0
Aerobe	Gluconobacter oxydans 621H	Aerobe	1.0
Aerobe	Gordonia bronchialis DSM 43247	Aerobe	1.0
Aerobe	Gramella forsetii KT0803	Aerobe	1.0
Aerobe	Granulicella tundricola	Aerobe	1.0
Aerobe	Haliangium ochraceum DSM 14365	Aerobe	1.0
Aerobe	Halothiobacillus neapolitanus c2	Aerobe	1.0
Aerobe	Herpetosiphon aurantiacus DSM 785	Aerobe	1.0
Aerobe	Hirschia baltica ATCC 49814	Aerobe	1.0
Aerobe	Hydrogenobaculum sp Y04AAS1	Anaerobe	1.0
Aerobe	Hyphomicrobium denitrificans ATCC 51888	Aerobe	1.0
Aerobe	Hyphomonas neptunium ATCC 15444	Aerobe	1.0
Aerobe	Idiomarina loihiensis L2TR	Aerobe	1.0
Aerobe	Intrasporangium calvum DSM 43043	Aerobe	1.0
Aerobe	Isosphaera pallida ATCC 43644	Aerobe	1.0
Aerobe	Jannaschia sp CCS1	Aerobe	1.0
Aerobe	Kineococcus radiotolerans SRS30216	Aerobe	1.0
Aerobe	Kocuria rhizophila DC2201	Aerobe	1.0
Aerobe	Kribbella flavida DSM 17836	Aerobe	1.0
Aerobe	Kyrpidia tusciae DSM 2912	Aerobe	1.0
Aerobe	Kytococcus sedentarius DSM 20547	Aerobe	1.0
Aerobe	Leadbetterella byssophila DSM 17132	Aerobe	1.0
Aerobe	Legionella longbeachae NSW150	Aerobe	1.0
Aerobe	Leifsonia xyli subsp xyli str CTCB07	Aerobe	1.0
Aerobe	Leptospira borgpetersenii serovar Hardjo-bovis JB197	Aerobe	0.980587923157
Aerobe	Leptothrix cholodnii SP-6	Aerobe	1.0
Aerobe	Lysinibacillus sphaericus C3-41	Aerobe	1.0
Aerobe	Marinithermus hydrothermalis DSM 14884	Aerobe	1.0
Aerobe	Marinomonas sp MWYL1	Aerobe	1.0
Aerobe	Meiothermus ruber DSM 1279	Aerobe	1.0
Aerobe	Mesorhizobium loti MAFF303099	Aerobe	1.0
Aerobe	Methylacidiphilum infernorum V4	Aerobe	0.826210796482
Aerobe	Methylobacillus flagellatus KT	Aerobe	1.0
Aerobe	Methylocella silvestris BL2	Aerobe	1.0
Aerobe	Methylococcus capsulatus str Bath	Aerobe	1.0
Aerobe	Methylotenera mobilis JLW8	Aerobe	1.0
Aerobe	Methylovorus glucosetrophus SIP3-4	Aerobe	1.0
Aerobe	Micrococcus luteus NCTC 2665	Aerobe	1.0
Aerobe	Microcystis aeruginosa NIES-843	Aerobe	1.0
Aerobe	Micromonospora aurantiaca ATCC 27029	Aerobe	1.0
Aerobe	Moraxella catarrhalis RH4	Aerobe	1.0
Aerobe	Mycobacterium abscessus	Aerobe	1.0
Aerobe	Myxococcus fulvus HW-1	Aerobe	1.0
Aerobe	Neisseria gonorrhoeae FA 1090	Aerobe	1.0
Aerobe	Nitrosococcus halophilus Nc4	Aerobe	1.0
Aerobe	Nitrosomonas europaea ATCC 19718	Aerobe	1.0
Aerobe	Nitrosospira multiformis ATCC 25196	Aerobe	1.0
Aerobe	Nocardia farcinica IFM 10152	Aerobe	1.0
Aerobe	Nocardioides sp JS614	Aerobe	1.0
Aerobe	Nostoc punctiforme PCC 73102	Aerobe	1.0
Aerobe	Novosphingobium aromaticivorans DSM 12444	Aerobe	1.0
Aerobe	Oceanobacillus iheyensis HTE831	Aerobe	1.0
Aerobe	Onion yellows phytoplasma OY-M	Anaerobe	1.0
Aerobe	Paracoccus denitrificans PD1222	Aerobe	1.0
Aerobe	Parvibaculum lavamentivorans DS-1	Aerobe	1.0
Aerobe	Parvularcula bermudensis HTCC2503	Aerobe	1.0
Aerobe	Pedobacter heparinus DSM 2366	Aerobe	1.0
Aerobe	Phenylobacterium zucineum HLK1	Aerobe	1.0
Aerobe	Pirellula staleyi DSM 6068	Aerobe	1.0
Aerobe	Planctomyces limnophilus DSM 3776	Aerobe	1.0
Aerobe	Polaromonas naphthalenivorans CJ2	Aerobe	1.0
Aerobe	Polynucleobacter necessarius subsp asymbioticus QLW-P1DMWA-1	Aerobe	1.0
Aerobe	Proteus mirabilis HI4320	Aerobe	1.0
Aerobe	Pseudoalteromonas atlantica T6c	Aerobe	1.0
Aerobe	Pseudomonas aeruginosa LESB58	Aerobe	1.0
Aerobe	Pseudonocardia dioxanivorans CB1190	Aerobe	1.0
Aerobe	Psychrobacter sp PRwf-1	Aerobe	1.0
Aerobe	Ramlibacter tataouinensis TTB310	Aerobe	1.0
Aerobe	Rhizobium etli CFN 42	Aerobe	1.0
Aerobe	Rhodococcus equi 103S	Aerobe	1.0
Aerobe	Rhodopirellula baltica SH 1	Aerobe	1.0
Aerobe	Rhodothermus marinus DSM 4252	Aerobe	1.0
Aerobe	Rickettsia africae ESF-5	Anaerobe	1.0
Aerobe	Robiginitalea biformata HTCC2501	Aerobe	1.0
Aerobe	Rothia dentocariosa ATCC 17931	Aerobe	1.0
Aerobe	Rubrobacter xylanophilus DSM 9941	Aerobe	1.0
Aerobe	Ruegeria pomeroyi DSS-3	Aerobe	1.0
Aerobe	Runella slithyformis DSM 19594	Aerobe	1.0
Aerobe	Saccharophagus degradans 2-40	Aerobe	1.0
Aerobe	Saccharopolyspora erythraea NRRL 2338	Aerobe	1.0
Aerobe	Salinibacter ruber DSM 13855	Aerobe	1.0
Aerobe	Salinispora arenicola CNS-205	Aerobe	1.0
Aerobe	Segniliparus rotundus DSM 44985	Aerobe	1.0
Aerobe	Sinorhizobium fredii NGR234	Aerobe	1.0
Aerobe	Sphingobium chlorophenolicum L-1	Aerobe	1.0
Aerobe	Sphingomonas wittichii RW1	Aerobe	1.0
Aerobe	Sphingopyxis alaskensis RB2256	Aerobe	1.0
Aerobe	Stackebrandtia nassauensis DSM 44728	Aerobe	1.0
Aerobe	Stenotrophomonas maltophilia K279a	Aerobe	1.0
Aerobe	Streptomyces avermitilis MA-4680	Aerobe	1.0
Aerobe	Streptosporangium roseum DSM 43021	Aerobe	1.0
Aerobe	Teredinibacter turnerae T7901	Aerobe	1.0
Aerobe	Thermaerobacter marianensis DSM 12885	Aerobe	1.0
Aerobe	Thermobaculum terrenum ATCC BAA-798	Aerobe	0.999999999998
Aerobe	Thermobifida fusca YX	Aerobe	1.0
Aerobe	Thermobispora bispora DSM 43833	Aerobe	1.0
Aerobe	Thermocrinis albus DSM 14484	Anaerobe	1.0
Aerobe	Thermomicrobium roseum DSM 5159	Aerobe	1.0
Aerobe	Thermomonospora curvata DSM 43183	Aerobe	1.0
Aerobe	Thioalkalivibrio sulfidophilus HL-EbGr7	Aerobe	1.0
Aerobe	Thiomonas intermedia K12	Aerobe	1.0
Aerobe	Trichodesmium erythraeum IMS101	Aerobe	1.0
Aerobe	Tropheryma whipplei TW08 27	Anaerobe	1.0
Aerobe	Truepera radiovictrix DSM 17093	Aerobe	1.0
Aerobe	Variovorax paradoxus EPS	Aerobe	1.0
Aerobe	Wolbachia endosymbiont of Culex quinquefasciatus Pel	Anaerobe	1.0
Aerobe	Xanthomonas axonopodis pv citri str 306	Aerobe	1.0
Aerobe	Xylanimonas cellulosilytica DSM 15894	Aerobe	1.0
Aerobe	Xylella fastidiosa 9a5c	Aerobe	1.0
Aerobe	Zunongwangia profunda SM-A87	Aerobe	1.0
Anaerobe	Acetohalobium arabaticum DSM 5501	Anaerobe	1.0
Anaerobe	Acidaminococcus fermentans DSM 20731	Anaerobe	1.0
Anaerobe	Acidimicrobium ferrooxidans DSM 10331	Aerobe	1.0
Anaerobe	Aerobecoccus urinae ACS-120-V-Col10a	Anaerobe	1.0
Anaerobe	Akkermansia muciniphila ATCC BAA-835	Anaerobe	1.0
Anaerobe	Alistipes shahii WAL 8301	Anaerobe	1.0
Anaerobe	Alkaliphilus oremlandii OhILAs	Anaerobe	1.0
Anaerobe	Aminobacterium colombiense DSM 12261	Anaerobe	1.0
Anaerobe	Ammonifex degensii KC4	Anaerobe	1.0
Anaerobe	Anaeroberococcus prevotii DSM 20548	Anaerobe	1.0
Anaerobe	Atopobium parvulum DSM 20469	Anaerobe	1.0
Anaerobe	Bacteroides fragilis YCH46	Anaerobe	0.998294619061
Anaerobe	Bifidobacterium adolescentis ATCC 15703	Anaerobe	1.0
Anaerobe	Bordetella petrii	Aerobe	1.0
Anaerobe	butyrate-producing bacterium SM4 1	Anaerobe	1.0
Anaerobe	Butyrivibrio proteoclasticus B316	Anaerobe	1.0
Anaerobe	Caldicellulosiruptor bescii DSM 6725	Anaerobe	1.0
Anaerobe	Calditerrivibrio nitroreducens DSM 19672	Anaerobe	1.0
Anaerobe	Candidatus Vesicomyosocius okutanii HA	Anaerobe	1.0
Anaerobe	Carboxydothermus hydrogenoformans Z-2901	Anaerobe	1.0
Anaerobe	[Cellvibrio] gilvus ATCC 13127	Aerobe	1.0
Anaerobe	Clostridium novyi NT	Anaerobe	1.0
Anaerobe	[Clostridium] sticklandii	Anaerobe	1.0
Anaerobe	Coprococcus catus GD 7	Anaerobe	1.0
Anaerobe	Coprothermobacter proteolyticus DSM 5265	Anaerobe	1.0
Anaerobe	Coriobacterium glomerans PW2	Anaerobe	1.0
Anaerobe	Cryptobacterium curtum DSM 15641	Anaerobe	1.0
Anaerobe	Deferribacter desulfuricans SSM1	Anaerobe	1.0
Anaerobe	Dehalococcoides ethenogenes 195	Anaerobe	1.0
Anaerobe	Dehalogenimonas lykanthroporepellens BL-DC-9	Anaerobe	1.0
Anaerobe	Denitrovibrio acetiphilus DSM 12809	Anaerobe	1.0
Anaerobe	Desulfarculus baarsii DSM 2075	Anaerobe	1.0
Anaerobe	Desulfatibacillum alkenivorans AK-01	Aerobe	0.999999999578
Anaerobe	Desulfitobacterium hafniense DCB-2	Anaerobe	0.979877346861
Anaerobe	Desulfobacterium autotrophicum HRM2	Anaerobe	0.517740466343
Anaerobe	Desulfobulbus propionicus DSM 2032	Anaerobe	0.99999999996
Anaerobe	Desulfococcus oleovorans Hxd3	Anaerobe	1.0
Anaerobe	Desulfohalobium retbaense DSM 5692	Anaerobe	1.0
Anaerobe	Desulfomicrobium baculatum DSM 4028	Anaerobe	0.999999929379
Anaerobe	Desulfotalea psychrophila LSv54	Anaerobe	1.0
Anaerobe	Desulfotomaculum acetoxidans DSM 771	Anaerobe	1.0
Anaerobe	Desulfovibrio desulfuricans subsp desulfuricans str ATCC 27774	Anaerobe	1.0
Anaerobe	Desulfurivibrio alkaliphilus AHT2	Anaerobe	1.0
Anaerobe	Desulfurobacterium thermolithotrophum DSM 11699	Anaerobe	1.0
Anaerobe	Dichelobacter nodosus VCS1703A	Anaerobe	1.0
Anaerobe	Dictyoglomus thermophilum H-6-12	Anaerobe	1.0
Anaerobe	Eggerthella lenta DSM 2243	Anaerobe	1.0
Anaerobe	Elusimicrobium minutum Pei191	Anaerobe	1.0
Anaerobe	Ethanoligenens harbinense YUAN-3	Anaerobe	1.0
Anaerobe	Eubacterium eligens ATCC 27750	Anaerobe	1.0
Anaerobe	Faecalibacterium prausnitzii L2-6	Anaerobe	1.0
Anaerobe	Fervidobacterium nodosum Rt17-B1	Anaerobe	1.0
Anaerobe	Fibrobacter succinogenes subsp succinogenes S85	Anaerobe	1.0
Anaerobe	Filifactor alocis ATCC 35896	Anaerobe	1.0
Anaerobe	Flexistipes sinusarabici DSM 4947	Anaerobe	1.0
Anaerobe	Fusobacterium nucleatum subsp nucleatum ATCC 25586	Anaerobe	1.0
Anaerobe	Gardnerella vaginalis 409-05	Anaerobe	1.0
Anaerobe	Gordonibacter pamelaeae 7-10-1-b	Anaerobe	1.0
Anaerobe	Halanaerobium hydrogeniformans	Anaerobe	1.0
Anaerobe	Halothermothrix orenii H 168	Anaerobe	1.0
Anaerobe	Heliobacterium modesticaldum Ice1	Anaerobe	1.0
Anaerobe	Herminiimonas arsenicoxydans	Aerobe	1.0
Anaerobe	Ilyobacter polytropus DSM 2926	Anaerobe	1.0
Anaerobe	Laribacter hongkongensis HLHK9	Aerobe	1.0
Anaerobe	Leptotrichia buccalis C-1013-b	Anaerobe	1.0
Anaerobe	Mahella australiensis 50-1 BON	Anaerobe	1.0
Anaerobe	Mannheimia succiniciproducens MBEL55E	Aerobe	0.999999991647
Anaerobe	Megamonas hypermegale ART12 1	Anaerobe	1.0
Anaerobe	Mobiluncus curtisii ATCC 43063	Anaerobe	1.0
Anaerobe	Moorella thermoacetica ATCC 39073	Anaerobe	1.0
Anaerobe	Nautilia profundicola AmH	Anaerobe	1.0
Anaerobe	Nitratiruptor sp SB155-2	Anaerobe	1.0
Anaerobe	Odoribacter splanchnicus DSM 20712	Anaerobe	1.0
Anaerobe	Olsenella uli DSM 7084	Anaerobe	1.0
Anaerobe	Opitutus terrae PB90-1	Aerobe	1.0
Anaerobe	Paludibacter propionicigenes WB4	Aerobe	0.999997981662
Anaerobe	Parabacteroides distasonis ATCC 8503	Anaerobe	0.999571791698
Anaerobe	Pelobacter carbinolicus DSM 2380	Anaerobe	0.999967318003
Anaerobe	Pelodictyon phaeoclathratiforme BU-1	Anaerobe	0.976102484024
Anaerobe	Pelotomaculum thermopropionicum SI	Anaerobe	1.0
Anaerobe	Petrotoga mobilis SJ95	Anaerobe	1.0
Anaerobe	Porphyromonas gingivalis W83	Anaerobe	1.0
Anaerobe	Prevotella denticola F0289	Anaerobe	1.0
Anaerobe	Psychromonas ingrahamii 37	Aerobe	1.0
Anaerobe	Roseburia intestinalis XB6B4	Anaerobe	1.0
Anaerobe	Ruminococcus albus 7	Anaerobe	1.0
Anaerobe	Sebaldella termitidis ATCC 33386	Anaerobe	1.0
Anaerobe	Slackia heliotrinireducens DSM 20476	Anaerobe	1.0
Anaerobe	Sphaerochaeta globus str Buddy	Anaerobe	1.0
Anaerobe	Spirochaeta thermophila DSM 6192	Anaerobe	1.0
Anaerobe	Sulfuricurvum kujiense DSM 16994	Anaerobe	1.0
Anaerobe	Sulfurimonas denitrificans DSM 1251	Anaerobe	1.0
Anaerobe	Synergistetes bacterium SGP1	Anaerobe	1.0
Anaerobe	Syntrophobacter fumaroxidans MPOB	Aerobe	0.999999999961
Anaerobe	Syntrophobotulus glycolicus DSM 8271	Anaerobe	1.0
Anaerobe	Syntrophomonas wolfei subsp wolfei str Goettingen	Anaerobe	1.0
Anaerobe	Syntrophothermus lipocalidus DSM 12680	Anaerobe	1.0
Anaerobe	Syntrophus aciditrophicus SB	Anaerobe	1.0
Anaerobe	Thermanaerovibrio acidaminovorans DSM 6589	Anaerobe	1.0
Anaerobe	Thermincola potens JR	Anaerobe	1.0
Anaerobe	Thermoanaerobacter italicus Ab9	Anaerobe	1.0
Anaerobe	Thermoanaerobacterium thermosaccharolyticum DSM 571	Anaerobe	1.0
Anaerobe	Thermodesulfatator indicus DSM 15286	Anaerobe	1.0
Anaerobe	Thermosediminibacter oceani DSM 16646	Anaerobe	1.0
Anaerobe	Thermosipho africanus TCF52B	Anaerobe	1.0
Anaerobe	Thermovibrio ammonificans HB-1	Anaerobe	1.0
Anaerobe	Treponema azotonutricium ZAS-9	Anaerobe	1.0
Anaerobe	Veillonella parvula DSM 2008	Anaerobe	1.0
